# Supplementary material for: Spending Time in Nature Serves as a Protective Factor against Problematic Alcohol Use: A Structural Equation Modeling Approach
Source: MDPI journal article supplement (doi:10.3390/ijerph192013356), 2022-10-16
Supplement: s1 [file s1]

# Spending Time in Nature Serves as a Protective Factor Against Problematic Alcohol Use: A Structural Equation Modeling Approach

Shahar Almog, Nichole M. Scaglione, JeeWon Cheong, Jillian M. Rung, Andrea Vásquez Ferreiro & Meredith S. Berry

## Supplementary Material

**Table S1.** Pearson correlations, means and standard deviations of the measures.

|          | Active Nature | Passive Nature |        |        |        |        |        | Affect (PANAS)    |                   | DD     | AUDIT   |         |         |         |         |         |         |         |         |          |
|----------|---------------|----------------|--------|--------|--------|--------|--------|-------------------|-------------------|--------|---------|---------|---------|---------|---------|---------|---------|---------|---------|----------|
|          | NatAct        | NP1            | NP2    | NP3    | NP5    | NP6    | NP8    | Positive PA_score | Negative NA_score | DD     | AUDIT 1 | AUDIT 2 | AUDIT 3 | AUDIT 4 | AUDIT 5 | AUDIT 6 | AUDIT 7 | AUDIT 8 | AUDIT 9 | AUDIT 10 |
| NP1      | 0.335         |                |        |        |        |        |        |                   |                   |        |         |         |         |         |         |         |         |         |         |          |
| NP2      | 0.263         | 0.794          |        |        |        |        |        |                   |                   |        |         |         |         |         |         |         |         |         |         |          |
| NP3      | 0.234         | 0.713          | 0.754  |        |        |        |        |                   |                   |        |         |         |         |         |         |         |         |         |         |          |
| NP5      | 0.357         | 0.751          | 0.684  | 0.656  |        |        |        |                   |                   |        |         |         |         |         |         |         |         |         |         |          |
| NP6      | 0.283         | 0.588          | 0.554  | 0.515  | 0.675  |        |        |                   |                   |        |         |         |         |         |         |         |         |         |         |          |
| NP8      | 0.182         | 0.434          | 0.367  | 0.315  | 0.365  | 0.241  |        |                   |                   |        |         |         |         |         |         |         |         |         |         |          |
| PA_score | 0.270         | 0.212          | 0.206  | 0.201  | 0.281  | 0.227  | 0.130  |                   |                   |        |         |         |         |         |         |         |         |         |         |          |
| NA_score | -0.207        | -0.133         | -0.129 | -0.103 | -0.184 | -0.095 | -0.109 | -0.401            |                   |        |         |         |         |         |         |         |         |         |         |          |
| DD       | 0.066         | -0.004         | -0.042 | -0.017 | -0.016 | -0.017 | -0.018 | -0.076            | -0.006            |        |         |         |         |         |         |         |         |         |         |          |
| AUDIT1   | 0.129         | 0.058          | 0.020  | -0.027 | 0.002  | 0.048  | -0.015 | 0.068             | 0.058             | 0.035  |         |         |         |         |         |         |         |         |         |          |
| AUDIT2   | -0.019        | -0.019         | -0.052 | -0.037 | -0.017 | 0.035  | 0.038  | 0.010             | 0.120             | 0.035  | 0.488   |         |         |         |         |         |         |         |         |          |
| AUDIT3   | -0.017        | -0.023         | -0.064 | -0.078 | -0.035 | 0.040  | 0.006  | 0.055             | 0.137             | 0.020  | 0.579   | 0.779   |         |         |         |         |         |         |         |          |
| AUDIT4   | -0.097        | 0.057          | -0.011 | -0.040 | -0.025 | 0.051  | 0.059  | -0.070            | 0.269             | 0.025  | 0.421   | 0.551   | 0.694   |         |         |         |         |         |         |          |
| AUDIT5   | -0.102        | 0.035          | -0.023 | -0.038 | -0.025 | 0.061  | 0.020  | -0.100            | 0.233             | -0.012 | 0.391   | 0.484   | 0.620   | 0.758   |         |         |         |         |         |          |
| AUDIT6   | -0.027        | 0.080          | 0.012  | 0.022  | 0.027  | 0.042  | 0.028  | -0.021            | 0.228             | -0.006 | 0.334   | 0.315   | 0.499   | 0.721   | 0.696   |         |         |         |         |          |
| AUDIT7   | -0.075        | -0.048         | -0.083 | -0.109 | -0.074 | 0.018  | -0.036 | -0.131            | 0.278             | 0.004  | 0.411   | 0.497   | 0.618   | 0.744   | 0.775   | 0.628   |         |         |         |          |
| AUDIT8   | -0.043        | 0.048          | -0.017 | -0.049 | -0.016 | 0.035  | 0.020  | -0.055            | 0.250             | -0.003 | 0.428   | 0.552   | 0.674   | 0.736   | 0.689   | 0.653   | 0.722   |         |         |          |
| AUDIT9   | -0.095        | -0.046         | -0.015 | -0.026 | -0.044 | -0.053 | -0.025 | -0.038            | 0.278             | -0.012 | 0.129   | 0.077   | 0.198   | 0.178   | 0.169   | 0.210   | 0.224   | 0.154   |         |          |
| AUDIT10  | -0.101        | 0.040          | .001   | 0.041  | -0.042 | 0.036  | 0.098  | -0.069            | 0.243             | -0.048 | 0.282   | 0.338   | 0.407   | 0.453   | 0.408   | 0.317   | 0.422   | 0.400   | 0.327   |          |
| Mean     | 8.81          | 4.81           | 4.68   | 4.64   | 4.55   | 4.65   | 3.56   | 32.05             | 16.63             | 0.220  | 1.42    | 0.46    | 0.49    | 0.21    | 0.16    | 0.12    | 0.24    | 0.21    | 0.11    | 0.30     |
| SD       | 2.437         | 1.726          | 1.845  | 2.015  | 1.574  | 1.261  | 1.974  | 9.589             | 7.827             | 0.207  | 1.323   | 0.870   | 0.914   | 0.673   | 0.561   | 0.502   | 0.667   | 0.637   | 0.498   | 0.891    |

*Note.*  $N = 340$ , NatAct = Active exposure to nature, NP = Passive exposure to nature, PA = Positive Affect, NA = Negative Affect, DD = Delay discounting AUC, AUDIT = Alcohol Use Disorders Identification Test, SD = Standard Deviation

**Table S2.** Fit indices of measurement and structural models.

|                                          | $\chi^2(df)$                | RMSEA | CFI   | SRMR  |
|------------------------------------------|-----------------------------|-------|-------|-------|
| <b>Model 1: Alcohol Consumption</b>      |                             |       |       |       |
| Measurement Model                        | 216.972 (85)<br>$p < .001$  | 0.068 | 0.928 | 0.069 |
| Structural Model                         | 218.760 (90)<br>$p < .001$  | 0.065 | 0.928 | 0.073 |
| <b>Model 2: Alcohol Related Problems</b> |                             |       |       |       |
| Measurement Model                        | 257.255 (151)<br>$p < .001$ | 0.045 | 0.947 | 0.064 |
| Structural Model                         | 259.900 (157)<br>$p < .001$ | 0.044 | 0.948 | 0.064 |

*Note.* Measurement models include all covariates paths. In the structural models nonsignificant covariate paths were set to zero.
